# Supplementary material
Source: PubMed Central journal article supplement (PMC2795564)
Supplement: 0908921106_Appendix_PDF.pdf [file 0908921106_Appendix_PDF.pdf]

## Supporting Information

Costa et al. 10.1073/pnas.0908921106

### Appendix A: Items per category used in the experiment:

The items presented in *italic* are those which are replaced with respect to Howard et al.'s (18) original stimuli. All the remaining items are identical to Howard et al.'s study.

Fruits: apple, banana, lemon, *grapes*, pear

Musical instruments: drum, guitar, piano, trumpet, violin

Tools: axe, drill, hammer, saw, screwdriver

Transport: bus, car, helicopter, airplane, *truck*

Fish: eel, *wale*, shark, ray, swordfish

Body parts: ear, eye, finger, hand, nose

Clothes: bra, jacket, *shirt*, skirt, sock

Tableware: cup, fork, glass, knife, spoon

Furniture: bed, chair, desk, stool, table

Bugs: beetle, butterfly, ladybug, spider, wasp

House parts: chimney, door, *stairs*, roof, window

Computer equipment: computer, joystick, keyboard, mouse, printer

Farm animals: cow, donkey, horse, pig, sheep

Shellfish: crab, lobster, *snail*, *clam*, prawn

White goods: *iron plate*, fridge, *toaster*, stove, washing machine

Reptiles and amphibians: crocodile, frog, lizard, snake, turtle

Vegetables: *pepper*, carrot, cauliflower, onion, *pumpkin*

Buildings: castle, church, *house*, lighthouse, windmill

Celestial phenomena: clouds, *sun*, lightning, moon, rainbow

Headgear: beret, cap, crown, hat, helmet

Audio-visual: headphones, microphone, radio, *record player*, television

Landscape features: *island*, *volcano*, mountain, ocean, *desert*
